## Very high-power short-duration temperature-controlled ablation for pulmonary vein isolation: The Fast-and-Furious study

Heeger CH.; Sano MS.; Meyer-Saraei RMS; Eitel CE.; Phan HL.; Hatahet SH.; Traub AT.; Delgado Lopez LDL; Vogler JV.; Kuck KH.; Tilz RRT

University of Luebeck, Medical clinic II, Luebeck, Germany

**Funding Acknowledgements:** Type of funding sources: None.

**Background:** Catheter ablation for atrial fibrillation (AF) treatment provides effective and durable PVI associated with encouraging clinical outcome. The novel QDot ablation catheter with Qmode + ablation mode (90W/4sec, Figure 1) offers the ability to possibly improve safety and decrease ablation procedure times.

**Aims:** We aim to evaluate safety and efficacy of the very high-power short-duration (vHP-SD) temperature-controlled radiofrequency (RF) ablation Qmode + mode for pulmonary vein isolation (PVI) utilizing the novel QDot micro ablation catheter. The data was compared to conventional power-controlled ablation index (AI) guided PVI.

**Methods:** Twenty-five consecutive patients with paroxysmal or persistent AF were prospectively enrolled, underwent vHP-SD based PVI (vHP-SD group) and were compared to 25 consecutive patients treated with conventional CF-sensing catheters (control).

**Results:** All PVs were successfully isolated utilizing Qmode +. The total median RF ablation time was vHP-SD: 334 (282, 369) sec. vs control: 1567 (1250, 1756) sec. ( $p < 0.0001$ ), the median procedure time was vHP-SD: 56 (48-62) vs. control: 104 (92-122) min ( $p < 0.0001$ ). No differences in periprocedural complications were observed.

**Conclusions:** The novel Qmode + provides safe and effective PVI with impressive short RF time and short procedures times. Procedure time and RF time were substantial lower in the vHP-SD group.

Abstract Figure 1

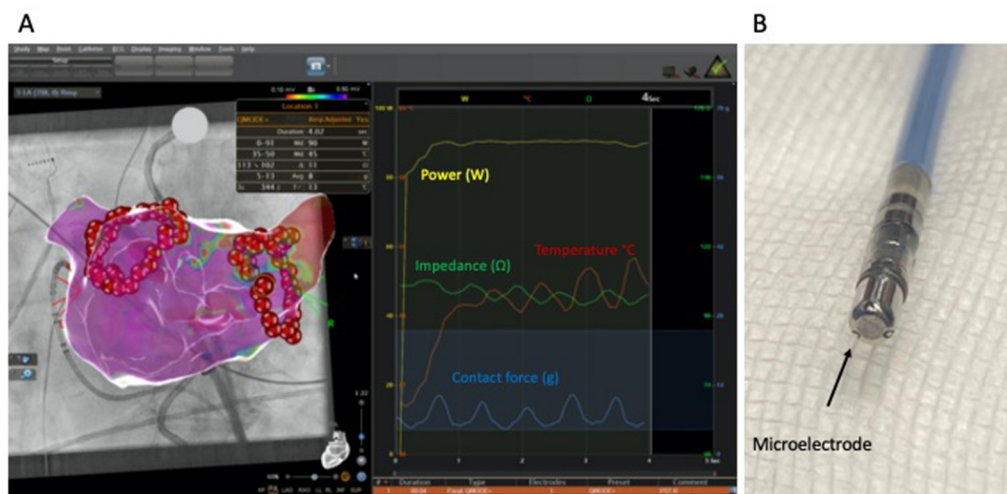

Source: http://academic.oup.com/europace/article-pdf/23/Supplement_3/euab116.216/38131223/euab116.216.pdf
